# Supplementary material for: Length-Dependent Deep Learning Model for RNA Secondary Structure Prediction
Source: MDPI journal article supplement (doi:10.3390/molecules27031030), 2022-02-02
Supplement: s1 [file s1]

# Length-Dependent Deep Learning Model for RNA Secondary Structure Prediction

Kangkun Mao, Jun Wang and Yi Xiao \*

School of Physics and Key Laboratory of Molecular Biophysics of the Ministry of Education,  
Huazhong University of Science and Technology, Wuhan 430074, China; mkk@hust.edu.cn (K.M.);  
junwang@hust.edu.cn (J.W.)

\* Correspondence: yxiao@hust.edu.cn

**Table S1.** The summary of TR0 dataset.

| Type       | 0~100 | 100~200 | 200~300 | 300~400 | 400~500 | Length  | Sequences |
|------------|-------|---------|---------|---------|---------|---------|-----------|
| 16sRNA     | 0     | 0       | 0       | 1       | 1       | 400~484 | 2         |
| 5sRNA      | 9     | 174     | 0       | 0       | 0       | 41~139  | 183       |
| CRISPR     | 41    | 0       | 0       | 0       | 0       | 35~47   | 41        |
| RNaseP     | 0     | 1       | 28      | 163     | 55      | 189~480 | 247       |
| groupI     | 0     | 0       | 15      | 10      | 17      | 210~487 | 42        |
| groupII    | 74    | 302     | 116     | 0       | 0       | 66~257  | 492       |
| microRNA   | 1070  | 520     | 15      | 2       | 0       | 52~364  | 1607      |
| Riboswitch | 85    | 238     | 135     | 0       | 0       | 43~248  | 458       |
| snRNA      | 632   | 670     | 65      | 11      | 1       | 46~416  | 1379      |
| tRNA       | 862   | 0       | 0       | 0       | 0       | 42~93   | 862       |
| tmRNA      | 0     | 1       | 8       | 183     | 19      | 102~433 | 211       |
| Other      | 2217  | 2372    | 376     | 256     | 69      | 33~498  | 5290      |
| total      | 4990  | 4278    | 758     | 626     | 162     | 33~498  | 10814     |

**Table S2.** The summary of VL0 dataset.

| Type       | 0~100 | 100~200 | 200~300 | 300~400 | 400~500 | Length  | Sequences |
|------------|-------|---------|---------|---------|---------|---------|-----------|
| 16sRNA     | 0     | 0       | 0       | 1       | 0       | 308~308 | 1         |
| 5sRNA      | 3     | 16      | 0       | 0       | 0       | 36~143  | 19        |
| CRISPR     | 6     | 0       | 0       | 0       | 0       | 35~37   | 6         |
| RNaseP     | 0     | 0       | 2       | 21      | 7       | 203~454 | 30        |
| groupI     | 0     | 0       | 3       | 2       | 2       | 218~497 | 7         |
| groupII    | 9     | 44      | 10      | 0       | 0       | 74~244  | 63        |
| microRNA   | 118   | 59      | 2       | 0       | 0       | 52~274  | 179       |
| riboswitch | 12    | 34      | 15      | 0       | 0       | 45~236  | 61        |
| snRNA      | 74    | 74      | 6       | 1       | 0       | 55~352  | 155       |
| tRNA       | 116   | 0       | 0       | 0       | 0       | 66~92   | 116       |
| tmRNA      | 0     | 0       | 0       | 15      | 2       | 347~421 | 17        |
| other      | 266   | 295     | 50      | 28      | 7       | 33~447  | 646       |
| Total      | 604   | 522     | 88      | 68      | 18      | 33~497  | 1300      |

**Table S3.** The summary of TS0 dataset.

| Type       | 0~100 | 100~200 | 200~300 | 300~400 | 400~500 | Length  | Sequences |
|------------|-------|---------|---------|---------|---------|---------|-----------|
| 16sRNA     | 0     | 0       | 0       | 1       | 0       | 344~344 | 1         |
| 5sRNA      | 3     | 26      | 1       | 0       | 0       | 94~242  | 30        |
| CRISPR     | 7     | 0       | 0       | 0       | 0       | 28~38   | 7         |
| RNaseP     | 0     | 0       | 1       | 18      | 4       | 278~432 | 23        |
| groupI     | 0     | 0       | 2       | 3       | 5       | 234~454 | 10        |
| groupII    | 5     | 38      | 12      | 0       | 0       | 75~241  | 55        |
| microRNA   | 119   | 79      | 3       | 0       | 0       | 52~238  | 201       |
| riboswitch | 13    | 18      | 17      | 0       | 0       | 43~236  | 48        |
| snRNA      | 67    | 69      | 8       | 4       | 0       | 56~386  | 148       |
| tRNA       | 129   | 0       | 0       | 0       | 0       | 57~93   | 129       |
| tmRNA      | 0     | 0       | 1       | 21      | 3       | 291~437 | 25        |
| other      | 243   | 290     | 49      | 29      | 17      | 22~499  | 628       |
| total      | 586   | 520     | 94      | 76      | 29      | 22~499  | 1305      |

**Table S4.** The summary of TR1\_neat dataset.

| Type       | Sequences | Minimumlength | Maximumlength |
|------------|-----------|---------------|---------------|
| 5sRNA      | 3         | 35            | 122           |
| tRNA       | 36        | 34            | 99            |
| tmRNA      | 1         | 68            | 68            |
| mRNA       | 1         | 49            | 49            |
| riboswitch | 20        | 33            | 125           |
| RNaseP     | 2         | 46            | 414           |
| group-II   | 2         | 388           | 418           |
| ribosome   | 3         | 37            | 57            |
| other      | 52        | 35            | 186           |
| Total      | 120       | 33            | 418           |

**Table S5.** The summary of VL1\_neat dataset.

| Type       | Sequences | Minimumlength | Maximumlength |
|------------|-----------|---------------|---------------|
| 5sRNA      | 1         | 121           | 121           |
| tRNA       | 13        | 35            | 122           |
| riboswitch | 5         | 34            | 127           |
| other      | 11        | 36            | 159           |
| Total      | 30        | 34            | 159           |

**Table S6.** The summary of TS1\_neat dataset.

| Type       | Sequences | Minimumlength | Maximumlength |
|------------|-----------|---------------|---------------|
| 5sRNA      | 3         | 34            | 122           |
| tRNA       | 17        | 69            | 92            |
| tmRNA      | 1         | 63            | 63            |
| mRNA       | 3         | 38            | 47            |
| riboswitch | 18        | 41            | 174           |
| RNaseP     | 2         | 34            | 160           |
| group-I    | 1         | 192           | 192           |
| group-II   | 1         | 70            | 70            |
| ribosome   | 2         | 33            | 55            |
| other      | 19        | 34            | 145           |
| total      | 67        | 33            | 192           |

**Table S7.** Performance of 2dRNA-LD (0.1) on test set TS0 for different types.

| Type       | Sequences | Length  | STY   | PPV   | MCC   |
|------------|-----------|---------|-------|-------|-------|
| 16sRNA     | 1         | 344~344 | 0.397 | 0.592 | 0.484 |
| 5sRNA      | 30        | 94~242  | 0.769 | 0.757 | 0.761 |
| CRISPR     | 7         | 28~38   | 0.841 | 0.806 | 0.821 |
| RNaseP     | 23        | 278~432 | 0.817 | 0.835 | 0.824 |
| groupI     | 10        | 234~454 | 0.492 | 0.704 | 0.581 |
| groupII    | 55        | 75~241  | 0.718 | 0.740 | 0.726 |
| microRNA   | 201       | 52~238  | 0.744 | 0.675 | 0.703 |
| riboswitch | 48        | 43~236  | 0.607 | 0.655 | 0.623 |
| snRNA      | 148       | 56~386  | 0.837 | 0.806 | 0.818 |
| tRNA       | 129       | 57~93   | 0.628 | 0.617 | 0.611 |
| tmRNA      | 25        | 291~437 | 0.936 | 0.970 | 0.952 |
| other      | 628       | 22~499  | 0.717 | 0.737 | 0.725 |
| total      | 1305      | 22~499  | 0.686 | 0.702 | 0.687 |

**Table 8.** Performance of 2dRNA-LD on test set TS0 for each length interval.

| <b>Pairing cutoff: 0.5</b> |                  |            |            |            |
|----------------------------|------------------|------------|------------|------------|
| <b>Sequences Interval</b>  | <b>Sequences</b> | <b>STY</b> | <b>PPV</b> | <b>MCC</b> |
| 0~100                      | 586              | 0.639      | 0.775      | 0.691      |
| 100~200                    | 520              | 0.496      | 0.711      | 0.576      |
| 200~300                    | 94               | 0.463      | 0.798      | 0.579      |
| 300~400                    | 76               | 0.476      | 0.786      | 0.591      |
| 400~500                    | 29               | 0.350      | 0.791      | 0.508      |
| total                      | 1305             | 0.553      | 0.752      | 0.627      |
| <b>Pairing cutoff: 0.3</b> |                  |            |            |            |
| <b>Sequences Interval</b>  | <b>Sequences</b> | <b>STY</b> | <b>PPV</b> | <b>MCC</b> |
| 0~100                      | 586              | 0.697      | 0.796      | 0.734      |
| 100~200                    | 520              | 0.573      | 0.713      | 0.623      |
| 200~300                    | 94               | 0.534      | 0.754      | 0.617      |
| 300~400                    | 76               | 0.553      | 0.800      | 0.645      |
| 400~500                    | 29               | 0.419      | 0.738      | 0.544      |
| total                      | 1305             | 0.621      | 0.759      | 0.672      |
| <b>Pairing cutoff: 0.1</b> |                  |            |            |            |
| <b>Sequences Interval</b>  | <b>Sequences</b> | <b>STY</b> | <b>PPV</b> | <b>MCC</b> |
| 0~100                      | 586              | 0.745      | 0.763      | 0.748      |
| 100~200                    | 520              | 0.647      | 0.642      | 0.637      |
| 200~300                    | 94               | 0.621      | 0.655      | 0.631      |
| 300~400                    | 76               | 0.644      | 0.724      | 0.675      |
| 400~500                    | 29               | 0.520      | 0.646      | 0.576      |
| total                      | 1305             | 0.686      | 0.702      | 0.687      |

**Table S9.** Performance of 2dRNA-LD-PDB on test set TS0.

| <b>Pairing cutoff: 0.5</b> |                  |            |            |            |
|----------------------------|------------------|------------|------------|------------|
| <b>Sequences Interval</b>  | <b>Sequences</b> | <b>STY</b> | <b>PPV</b> | <b>MCC</b> |
| 0~100                      | 586              | 0.612      | 0.751      | 0.664      |
| 100~200                    | 520              | 0.384      | 0.655      | 0.479      |
| 200~300                    | 94               | 0.287      | 0.690      | 0.422      |
| 300~400                    | 76               | 0.261      | 0.713      | 0.411      |
| 400~500                    | 29               | 0.193      | 0.674      | 0.332      |
| total                      | 1305             | 0.468      | 0.704      | 0.551      |
| <b>Pairing cutoff:0.3</b>  |                  |            |            |            |
| <b>Sequences Interval</b>  | <b>Sequences</b> | <b>STY</b> | <b>PPV</b> | <b>MCC</b> |
| 0~100                      | 586              | 0.686      | 0.749      | 0.707      |
| 200~300                    | 520              | 0.483      | 0.636      | 0.538      |
| 200~300                    | 94               | 0.414      | 0.633      | 0.498      |
| 300~400                    | 76               | 0.368      | 0.642      | 0.477      |
| 400~500                    | 29               | 0.281      | 0.534      | 0.377      |
| total                      | 1305             | 0.558      | 0.685      | 0.604      |
| <b>Pairing cutoff:0.1</b>  |                  |            |            |            |
| <b>Sequences Interval</b>  | <b>Sequences</b> | <b>STY</b> | <b>PPV</b> | <b>MCC</b> |
| 0~100                      | 586              | 0.744      | 0.695      | 0.711      |
| 100~200                    | 520              | 0.569      | 0.533      | 0.543      |
| 200~300                    | 94               | 0.528      | 0.481      | 0.499      |
| 300~400                    | 76               | 0.486      | 0.498      | 0.487      |
| 400~500                    | 29               | 0.396      | 0.397      | 0.394      |
| total                      | 1305             | 0.636      | 0.597      | 0.609      |
